# Supplementary material
Source: PubMed Central journal article supplement (PMC2721791)
Supplement: blood-2009-03-208835_1.pdf [file blood-2009-03-208835_1.pdf]

| Name of the oligonucleotide | Sequence from 5' to 3'                           |
|-----------------------------|--------------------------------------------------|
| Hexon 1                     | CCAATGAAACCATGTTACGG                             |
| Hexon 2                     | TCGTCCATGGGATCCACC                               |
| Hexon 3                     | CAATTTTTCGACGTCCCTGGCGGAAGTCC                    |
| Hexon 4                     | AGGGACGTGAAAAATTGCATTTCCAC                       |
| Hexon 5                     | AATACAAACCTAAAGTGGTATTGTACAGTG                   |
| Hexon 6                     | CCACTTTAGGTTTGTATTCTTCCCCACTACC                  |
| Hexon 7                     | TGCTTTCCACTGAATGGCACTGGAACCAATTCC                |
| Hexon 8                     | AGTGCCATTGAGTGGAAAGCAGTAATTTGG                   |
| Hexon 9                     | ACAAAACCAAATAAGAGTTGGAAATAATTTTGCC               |
| Hexon 10                    | AACTCTTATTTGGTTTTGTCTAGAAATTGCATCG               |
| E451QF                      | CAGATAAAAATCAAATAAGAGTTGG                        |
| E451QR                      | CCAACTCTTATTTGATTTTATCTG                         |
| HVR5*F                      | TTCTCAACTCCTGGGGCAGCCGCA                         |
| HVR5*R                      | TGCGGCTGCCCCAGGAGTTGAGAA                         |
| HVR7*F                      | CTGGGAGGTGTGGGTAATAATAGCACTTATACCAAGG<br>TAAACCT |
| HVR7*R                      | AGGTTTTACCTTGGTATAAGTGCTATTATTACCCACAC<br>CTCCAG |
| 2KbDIR                      | ACAGTGGAAGGTCGACGC                               |
| 2KbREV                      | ACTTGACTTTCTAGCTTTCC                             |
